# Supplementary material for: Do Swiss Diets Align with the Planetary Health Diet Recommendations?
Source: Research Square preprint supplement (doi:10.21203/rs.3.rs-8500417/v1), 2026-01-12
Supplement: Supplementary file 1 [file ab79be0840949461697e6b8d.docx]

**Supplementary Appendix**

**Do Swiss Diets Align with the Planetary Health Diet Recommendations?**

**Authors**

Selina Randegger 1, 2*, Nele Endner 1*, Carla Wunderle 1, Nina Kaegi-Braun 3, Philipp Schuetz 1, 2

1 Medical University Department, Division of General Internal Medicine, Endocrinology, Diabetes and Metabolism, Kantonsspital Aarau,

Tellstrasse 25, 5001 Aarau, Switzerland

2 Medical Faculty of the University of Basel, Klingelbergstrasse 61, 4056 Basel, Switzerland

3 Department of Medicine, Huddinge, Karolinska Institutet, Stockholm, Sweden

*equally contributing first authors

Table of contents

[Supplementary Table 1: Matching 3](#_Toc204307703)

[Supplementary Table 2: Baseline characteristics stratified by age 4](#_Toc204307704)

[Supplementary Table 3: Daily intakes in grams for each food group 5](#_Toc204307705)

[Supplementary Table 4: Planetary Health Diet Index (PHDI) 7](#_Toc204307706)

[Supplementary Table 5: Univariable linear regression analyses of factors associated with the Planetary Health Diet Index (PHDI). 8](#_Toc204307707)

[Supplementary Table 6: Sociodemographic predictors being with the planetary health diet reference range 9](#_Toc204307708)

[Supplementary Figure 1: Participant flow chart 11](#_Toc204307709)

[Supplementary Figure 2: Weighted density plot of the Planetary Health Diet Index 12](#_Toc204307710)

*°Corresponding author. E-mail address: schuetzph@gmail.com (P.Schuetz)*

| Supplementary Table 1: Matching | | | |
| --- | --- | --- | --- |
| **Planetary Health Diet** | **menuCH food categories** | | |
| **Categories** | **Main category** | **Subcategory** | **Subsubcategory** |
| Whole grains | Cereals, cereal products and grains | Savoury sandwiches, filled rolls, croissants, tartlets and tarts | Potato crisps |
| Cakes, tarts, sweet pastries, patisserie and pastries1 |
| Tubers or starchy vegetables | Potatoes and other starchy root tubers | Aperitif pastries (without potato crisps) |  |
| Vegetables | Vegetables |  |  |
| Fruits |  | Fruits |  |
| Unspecified and mixed fruits, nuts and seeds |
| Beef, lamb, pork | Meat and meat products (excluding poultry and meat substitute products) |  |  |
| Poultry | Poultry |  |  |
| Eggs | Eggs and egg products |  |  |
| Fish | Fish, seafood, amphibians and reptiles |  |  |
| Legumes | Legumes | Meat substitute products | Vegetarian products and dishes |
| Nuts |  | Nuts and seeds |  |
| Olives |
| Dairy Foods | Milk, dairy products, milk substitutes |  |  |
| Unsaturated oils | Fats and oils2 |  |  |
| Saturated oils | Fats and oils2 |  |  |
| All sugars | Sugar, chocolate and sweets2 |  | Artificial sweeteners1 |
| Cakes, tarts, sweet pastries, patisserie and pastries2 |
| 1Mean kcal values for this category were calculated only on the proportion of starch  2 Mean kcal values for these categories were calculated based only on the proportion of sugar, saturated fat, and unsaturated fat.  *menuCH* food categories that were not assigned to the PHD categories: soups and bouillons, non-alcoholic beverages, alcoholic beverages, seasonings, spices, yeasts, herbs and sauces, unspecified and mixed miscellaneous foods, diet products and sports nutrition, unspecified and mixed dietary products and sports nutrition, meal replacements and sports nutrition | | | |

| Supplementary Table 2: Baseline characteristics stratified by age | | | | |
| --- | --- | --- | --- | --- |
|  | **Overall** | **<47 years** | **≥47 years** | **p-value** |
| n, % | 2057 (100) | 1027 (49.9) | 1030 (50.1) |  |
| **General characteristics** |  |  |  |  |
| Female sex (n, %) | 1124 (54.6) | 588 (57.3) | 536 (52.0) | 0.020 |
| **Anthropometrics** |  |  |  |  |
| Weight kg, mean (SD) | 73.5 (15.7) | 72.3 (15.8) | 74.6 (15.4) | 0.001 |
| Height cm, mean (SD) | 169.9 (9.2) | 171.2 (9.2) | 168.6 (9.0) | <0.001 |
| BMI kg/m2, mean (SD) | 25.0 (4.4) | 24.1 (4.3) | 25.8 (4.4) | <0.001 |
| BMI (n, %) |  |  |  |  |
| Underweight (<18.5 kg/m2) | 50 (2.4) | 34 (3.3) | 16 (1.6) | <0.001 |
| Normal (18.5-24.9 kg/m2) | 1093 (53.1) | 632 (61.5) | 461 (44.8) |  |
| Overweight (>25 kg/m2) | 880 (42.8) | 330 (32.1) | 550 (53.4) |  |
| Unknown | 34 (1.7) | 31 (3.0) | 3 (0.3) |  |
| **Sociodemographics** |  |  |  |  |
| Education level (n, %) |  |  |  |  |
| Primary | 89 (4.3) | 39 (3.8) | 50 (4.9) | 0.001 |
| Secondary | 968 (47.1) | 447 (43.5) | 521 (50.6) |  |
| Tertiary | 997 (48.5) | 538 (52.4) | 459 (44.6) |  |
| Unknown | 3 (0.1) | 3 (0.3) | 0 (0.0) |  |
| Income (n, %) |  |  |  |  |
| <6000 CHF/month | 346 (16.8) | 160 (15.6) | 186 (18.1) | 0.05 |
| 6000-9000 CHF/month | 426 (20.7) | 195 (19.0) | 231 (22.4) |  |
| >9000 CHF/month | 700 (34.0) | 364 (35.4) | 336 (32.6) |  |
| Unknown | 585 (28.4) | 308 (30.0) | 277 (26.9) |  |
| Nationality (n, %) |  |  |  |  |
| Swiss | 1731 (84.2) | 814 (79.3) | 917 (89.0) | <0.001 |
| Non-Swiss | 323 (15.7) | 210 (20.4) | 113 (11.0) |  |
| Unknown | 3 (0.1) | 3 (0.3) | 0 (0.0) |  |
| Baseline characteristics of the study population overall and by age group. Values are presented as weighted percentages for categorical variables and as weighted means (SD) for continuous variables. Comparisons between age groups (≥47 years vs. <47 years) were performed using χ² tests for categorical variables and weighted linear regression for continuous variables. **P-values** indicate statistical significance of differences between the two age groups. All results were weighted for sex, marital status, major area of Switzerland, nationality, household size, season, and weekday. | | | | |

| Supplementary Table 3: Daily intakes in grams for each food group | | | | | | | | | | | | | | |
| --- | --- | --- | --- | --- | --- | --- | --- | --- | --- | --- | --- | --- | --- | --- |
|  | Grains | Potatoes & starchy vegetables | Vegetables | Fruits | Meat (excluding poultry) | Poultry | Eggs | Fish and seafood | Legumes | Nuts and Seeds | Dairy foods | Unsaturated oils | Saturated oils | Sugar | |
| **EAT-Lancet Planetary Health reference diet** |  |  |  |  |  |  |  |  |  |  |  |  |  |  | |
| Reference intake (g/day) | 232 | 50 | 300 | 200 | 14 | 29 | 13 | 28 | 75 | 50 | 250 | 40 | 11.8 | 31 | |
| Reference range (g/day) | 132-332 | 0-100 | 200-600 | 100-300 | 0-28 | 0-58 | 0-25 | 0-100 | 0-100 | 0-75 | 0-500 | 20-80 | 0-11.8 | 0-31 | |
| **Overall Swiss diet** |  |  |  |  |  |  |  |  |  |  |  |  |  |  | |
| Mean intake (g/day), (SE) | 258 (5) | 57 (3) | 191 (5) | 183 (6) | 85 (3) | 31 (2) | 12 (1) | 25 (2) | 8 (1) | 6 (1) | 254 (6) | 15 (0) | 10 (0) | 29 (1) | |
| Difference in mean (menuCH - PHD) | +26 | +7 | -109 | -17 | +71 | +2 | -1 | -3 | -67 | -44 | +4 | -25 | -2 | -2 | |
| % within PHD range | 40 | 83 | 24 | 29 | 41 | 85 | 86 | 93 | 98 | 99 | 88 | 20 | 75 | 71 | |
| % of PHD recommendation (mean; PHD = 100%) | 111 | 114 | 64 | 92 | 607 | 107 | 92 | 89 | 11 | 12 | 102 | 38 | 85 | 94 | |
| **Women** |  |  |  |  |  |  |  |  |  |  |  |  |  |  | |
| Mean intake (g/day), (SE) | 218 (5) | 52 (3) | 207 (7) | 209 (10) | 63 (3) | 28 (2) | 12 (1) | 25 (2) | 9 (2) | 6 (1) | 266 (9) | 14 (0) | 9 (0) | 26 (1) | |
| Difference in mean (menuCH - PHD) | -14 | +2 | -93 | +9 | +49 | -1 | -1 | -3 | -66 | -44 | +16 | -26 | -2 | -5 | |
| % within PHD range | 38 | 86 | 24 | 31 | 52 | 87 | 87 | 94 | 98 | 99 | 88 | 17 | 78 | 77 | |
| % of PHD recommendation (mean; PHD = 100%) | 94 | 104 | 69 | 105 | 452 | 97 | 91 | 90 | 12 | 13 | 107 | 36 | 79 | 84 | |
| **Men** |  |  |  |  |  |  |  |  |  |  |  |  |  |  | |
| Mean intake (g/day), (SE) | 299 (9) | 63 (4) | 175 (6) | 156 (7) | 107 (5) | 34 (3) | 13 (1) | 26 (2) | 6 (1) | 6 (1) | 241 (8) | 16 (0) | 10 (0) | 31 (1) | |
| Difference in mean (menuCH - PHD) | +67 | +13 | -125 | -44 | +93 | +5 | 0 | -2 | -69 | -44 | -9 | -24 | -2 | 0 | |
| % within PHD range | 43 | 81 | 25 | 27 | 27 | 83 | 85 | 92 | 98 | 99 | 87 | 25 | 71 | 64 | |
| % of PHD recommendation (mean; PHD = 100%) | 129 | 126 | 58 | 78 | 764 | 117 | 100 | 91 | 8 | 12 | 96 | 41 | 86 | 100 | |
| **Age <47 years** |  |  |  |  |  |  |  |  |  |  |  |  |  |  | |
| Mean intake (g/day), (SE) | 283 (8) | 61 (4) | 186 (6) | 155 (8) | 89 (4) | 36 (3) | 13 (1) | 26 (2) | 9 (1) | 6 (1) | 258 (10) | 16 (0) | 10 (0) | 29 (1) | |
| Difference in mean (menuCH - PHD) | +51 | +11 | -114 | -45 | +75 | +7 | 0 | -2 | -66 | -44 | +8 | -24 | -2 | -2 | |
| % within PHD range | 41 | 83 | 25 | 26 | 40 | 82 | 86 | 93 | 98 | 99 | 87 | 22 | 74 | 69 | |
| % of PHD recommendation (mean; PHD = 100%) | 122 | 121 | 62 | 77 | 637 | 124 | 97 | 94 | 12 | 13 | 103 | 40 | 84 | 95 | |
| **Age ≥47 years** |  |  |  |  |  |  |  |  |  |  |  |  |  |  | |
| Mean intake (g/day), (SE) | 229 (7) | 54 (3) | 197 (7) | 215 (9) | 80 (3) | 26 (3) | 12 (1) | 24 (2) | 6 (1) | 6 (0) | 248 (8) | 15 (0) | 10 (0) | 28 (1) | |
| Difference in mean (menuCH - PHD) | -3 | +4 | -103 | +15 | +66 | -3 | -1 | -4 | -69 | -44 | -2 | -25 | -2 | -3 | |
| % within PHD range | 39 | 83 | 24 | 33 | 42 | 88 | 86 | 94 | 99 | 99 | 89 | 18 | 76 | 73 | |
| % of PHD recommendation (mean; PHD = 100%) | 99 | 107 | 66 | 107 | 572 | 88 | 95 | 87 | 8 | 12 | 99 | 36 | 81 | 89 | |

Daily intakes in grams by age and sex for each food group; Values are presented as mean intake in g/day (SE), Difference in mean, % within PHD range and % of PHD recommendation. All results were weighted for sex, age, marital status, major area of Switzerland, nationality, household size, season, and weekday.

SE = standard error, PHD = Planetary Health Diet

All results were weighted for sex, age, marital status, major area of Switzerland, nationality, household size, season and weekday

| Supplementary Table 4: Planetary Health Diet Index (PHDI) | | | |
| --- | --- | --- | --- |
|  | **mean (SD)** | **median** | **%** |
| **Overall** |  |  |  |
| mean (SD) | 82.1 (12.5) | 81.8 | 58.6 |
| **Female** |  |  |  |
| mean (SD) | 84.5 (12.0) | 83.9 | 60.4 |
| **Male** |  |  |  |
| mean (SD) | 79.6 (12.5) | 78.7 | 56.9 |
| **<47 years** |  |  |  |
| mean (SD) | 81.3 (12.6) | 81.5 | 58.1 |
| **≥47 years** |  |  |  |
| mean (SD) | 82.9 (12.3) | 82.3 | 59.2 |
| **Education** |  |  |  |
| Primary, mean (SD) | 80.5 (13.8) | 78.2 | 57.5 |
| Secondary, mean (SD) | 81.3 (12.2) | 80.7 | 58.1 |
| Tertiary, mean (SD) | 82.9 (12.6) | 82.6 | 59.2 |
| **Income** |  |  |  |
| Low, mean (SD) | 82.1 (12.9) | 81.6 | 58.6 |
| Middle, mean (SD) | 81.8 (12.8) | 82.1 | 58.4 |
| High, mean (SD) | 82.3 (11.9) | 81.9 | 58.8 |
| Unknown, mean (SD) | 81.4 (12.0) | 81.7 | 58.1 |
| Planetary Health Diet Index (PHDI) scores by sex, age group, income, and education level in the Swiss population. A higher PHDI score indicates better adherence with the EAT-Lancet recommendations.  Values are presented as mean (SD). All results were weighted for sex, age, marital status, major area of Switzerland, nationality, household size, season, and weekday.  Income categories: low / middle / high / unknown.  Education categories: primary / secondary / tertiary  SD=standard deviation | | | |

| Supplementary Table 5: Univariable linear regression analyses of factors associated with the Planetary Health Diet Index (PHDI). | |
| --- | --- |
|  | Coefficient (95%CI) p-value |
| **Sex*** |  |
| Female vs. male | 4.98 (3.65 to 6.32) p<0.001 |
|  |  |
| **Age*** |  |
| ≥47 years vs. <47 years | 1.52 (0.17 to 2.87) p=0.027 |
|  |  |
| **Education**** |  |
| Primary | reference |
| Secondary | 0.75 (-3.23 to 4.72) p=0.71 |
| Tertiary | 2.35 (-1.65 to 6.35) p=0.25 |
|  |  |
| **Income***** |  |
| <6000 CHF/month | reference |
| 6000-9000 CHF/month | -0.24 (-2.48 to 2.01) p=0.84 |
| >9000 CHF/month | 0.26 (-1.76 to 2.28) p=0.80 |
| Unknown | -0.64 (-3.20 to 1.92) p=0.62 |
| Regression coefficients (β) with 95% confidence intervals (CI) are presented for sex, age group, education level, and household income group. Age was dichotomised at the sample median (<47 / ≥47 years).  Education categories: low, middle, high, unknown. Income categories: low, middle, high, unknown. All analyses were weighted for sex, age, marital status, major region of Switzerland, nationality, household size, season, and weekday.  Where indicated, univariable models were additionally adjusted for potential confounders:  * adjusted for education and income  ** adjusted for income  *** adjusted for education | |

| Supplementary Table 6: Sociodemographic predictors being with the planetary health diet reference range | | | | | | | | | | | | | | | |
| --- | --- | --- | --- | --- | --- | --- | --- | --- | --- | --- | --- | --- | --- | --- | --- |
|  | **Grains** | **Potatoes & starchy vegetables** | **Vegetables** | **Fruits** | **Meat (excluding poultry)** | **Poultry** | **Eggs** | **Fish and seafood** | **Legumes** | **Nuts and Seeds** | **Dairy foods** | **Unsaturated oils** | **Saturated oils** | **Sugar** | | |
| **Sex** |  |  |  |  |  |  |  |  |  |  |  |  |  |  | | |
| Female vs. male | 0.78 (0.57 to 1.07) p=0.12 | 1.41 (1.08 to 1.84) p=0.011 | 1.06 (0.83 to 1.34) p=0.65 | 1.38 (1.08 to 1.76) p=0.011 | 2.12 (1.55 to 2.91) p=<0.001 | 1.24 (0.81 to 1.89) p=0.32 | 1.24 (0.98 to 1.58) p=0.08 | 1.01 (0.66 to 1.53) p=0.98 | 0.95 (0.85 to 1.07) p=0.43 | 0.52 (0.34 to 0.80) p=0.003 | 0.80 (0.58 to 1.12) p=0.20 | 0.72 (0.54 to 0.96), p=0.026 | 1.33 (1.03 to 1.71), p=0.030 | 1.59 (1.23 to 2.05), p=<0.001 | | |
| **Age** |  |  |  |  |  |  |  |  |  |  |  |  |  |  | | |
| ≥47 years vs. <47 years | 1.05 (0.77 to 1.42) p=0.78 | 1.99 (1.52 to 2.60) p=<0.001 | 1.21 (0.96 to 1.54) p=0.11 | 1.26 (0.99 to 1.61) p=0.07 | 0.91 (0.67 to 1.22) p=0.52 | 1.88 (1.24 to 2.84) p=0.003 | 0.82 (0.64 to 1.04) p=0.11 | 1.08 (0.70 to 1.67) p=0.72 | 0.95 (0.85 to 1.07) p=0.43 | 0.87 (0.60 to 1.26) p=0.47 | 0.54 (0.39 to 0.75) p=<0.001 | 0.73 (0.55 to 0.97), p=0.028 | 1.13 (0.88 to 1.45), p=0.35 | 1.15 (0.90 to 1.48), p=0.27 | | |
| **Education** |  |  |  |  |  |  |  |  |  |  |  |  |  |  | | |
| Primary | reference | reference | reference | reference | reference | reference | reference | reference | reference | reference | reference | reference | reference | reference | | |
| Secondary | 1.15 (0.59 to 2.25) p=0.68 | 1.13 (0.61 to 2.10) p=0.70 | 0.75 (0.41 to 1.37) p=0.35 | 0.61 (0.35 to 1.09) p=0.09 | 1.05 (0.51 to 2.18) p=0.90 | 1.08 (0.46 to 2.51) p=0.87 | 0.99 (0.56 to 1.76) p=0.97 | 1.15 (0.49 to 2.74) p=0.74 | 0.98 (0.73 to 1.31) p=0.89 | 0.65 (0.24 to 1.78) p=0.40 | 1.05 (0.52 to 2.10) p=0.90 | 0.54 (0.29 to 1.02), p=0.06 | 0.91 (0.49 to 1.69), p=0.77 | 0.75 (0.39 to 1.42), p=0.37 | | |
| Tertiary | 0.86 (0.44 to 1.69) p=0.66 | 1.33 (0.71 to 2.50) p=0.37 | 0.55 (0.30 to 1.02) p=0.06 | 0.65 (0.36 to 1.16) p=0.14 | 1.44 (0.69 to 3.01) p=0.33 | 0.93 (0.40 to 2.18) p=0.87 | 0.81 (0.45 to 1.44) p=0.47 | 1.10 (0.46 to 2.66) p=0.83 | 1.06 (0.79 to 1.42) p=0.72 | 0.54 (0.19 to 1.52) p=0.24 | 1.20 (0.60 to 2.41) p=0.61 | 0.72 (0.38 to 1.35), p=0.30 | 0.70 (0.37 to 1.30), p=0.26 | 0.80 (0.42 to 1.54), p=0.51 | | |
|  |  |  |  |  |  |  |  |  |  |  |  |  |  |  | | |
| **Income** |  |  |  |  |  |  |  |  |  |  |  |  |  |  | | |
| <6000 CHF/month |  | reference | reference | reference | reference | reference | reference | reference | reference | reference | reference | reference | reference | reference | | |
| 6000-9000 CHF/month | 1.01 (0.65 to 1.58) p=0.96 | 1.34 (0.91 to 1.98) p=0.14 | 1.14 (0.81 to 1.63) p=0.45 | 0.71 (0.50 to 1.02) p=0.06 | 0.74 (0.48 to 1.13) p=0.16 | 0.99 (0.52 to 1.88) p=0.99 | 1.10 (0.77 to 1.58) p=0.60 | 0.80 (0.42 to 1.51) p=0.49 | 0.95 (0.80 to 1.14) p=0.58 | 1.51 (0.90 to 2.53) p=0.12 | 0.84 (0.51 to 1.37) p=0.48 | 1.19 (0.80 to 1.78), p=0.39 | 1.14 (0.79 to 1.65), p=0.48 | 0.96 (0.67 to 1.39), p=0.84 | | |
| >9000 CHF/month | 1.04 (0.67 to 1.60) p=0.86 | 0.87 (0.61 to 1.23) p=0.43 | 1.18 (0.85 to 1.63) p=0.32 | 0.99 (0.71 to 1.39) p=0.96 | 0.57 (0.38 to 0.87) p=0.010 | 1.36 (0.76 to 2.42) p=0.30 | 0.92 (0.66 to 1.28) p=0.61 | 0.81 (0.46 to 1.42) p=0.45 | 0.96 (0.82 to 1.13) p=0.65 | 1.11 (0.69 to 1.79) p=0.67 | 0.84 (0.55 to 1.29) p=0.43 | 0.82 (0.57 to 1.19), p=0.30 | 1.49 (1.06 to 2.09), p=0.022 | 1.12 (0.80 to 1.56), p=0.52 | | |
| Unknown | 0.91 (0.54 to 1.53) p=0.73 | 0.77 (0.50 to 1.18) p=0.23 | 1.22 (0.80 to 1.86) p=0.36 | 0.79 (0.51 to 1.22) p=0.28 | 0.61 (0.36 to 1.02) p=0.06 | 0.96 (0.51 to 1.83) p=0.90 | 0.93 (0.61 to 1.41) p=0.73 | 0.78 (0.39 to 1.57) p=0.48 | 0.99 (0.80 to 1.22) p=0.90 | 0.87 (0.42 to 1.78) p=0.70 | 1.09 (0.65 to 1.84) p=0.74 | 1.29 (0.81 to 2.06), p=0.28 | 1.56 (1.00 to 2.43), p=0.05 | 1.57 (1.01 to 2.45), p=0.044 | | |
| Sociodemographic predictors of adherence to the Planetary Health Diet reference range (logistic regression analysis). Odds ratios (OR) with 95% confidence intervals (CI) are shown for each sociodemographic factor, including sex, age group, education level, and household income.  Age was dichotomised at the sample median (<47 / ≥47 years). Education categories: low, middle, high, unknown. Income categories: low, middle, high, unknown.  All analyses were weighted for sex, age, marital status, major region of Switzerland, nationality, household size, season, and weekday.  * adjusted for education and income  ** adjusted for income  *** adjusted for education | | | | | | | | | | | | | | |

Supplementary Figure 1: Participant flow chart

no informed consent (n=3410)

loss to follow up (n= 29)

Supplementary Figure 2: Weighted density plot of the Planetary Health Diet Index


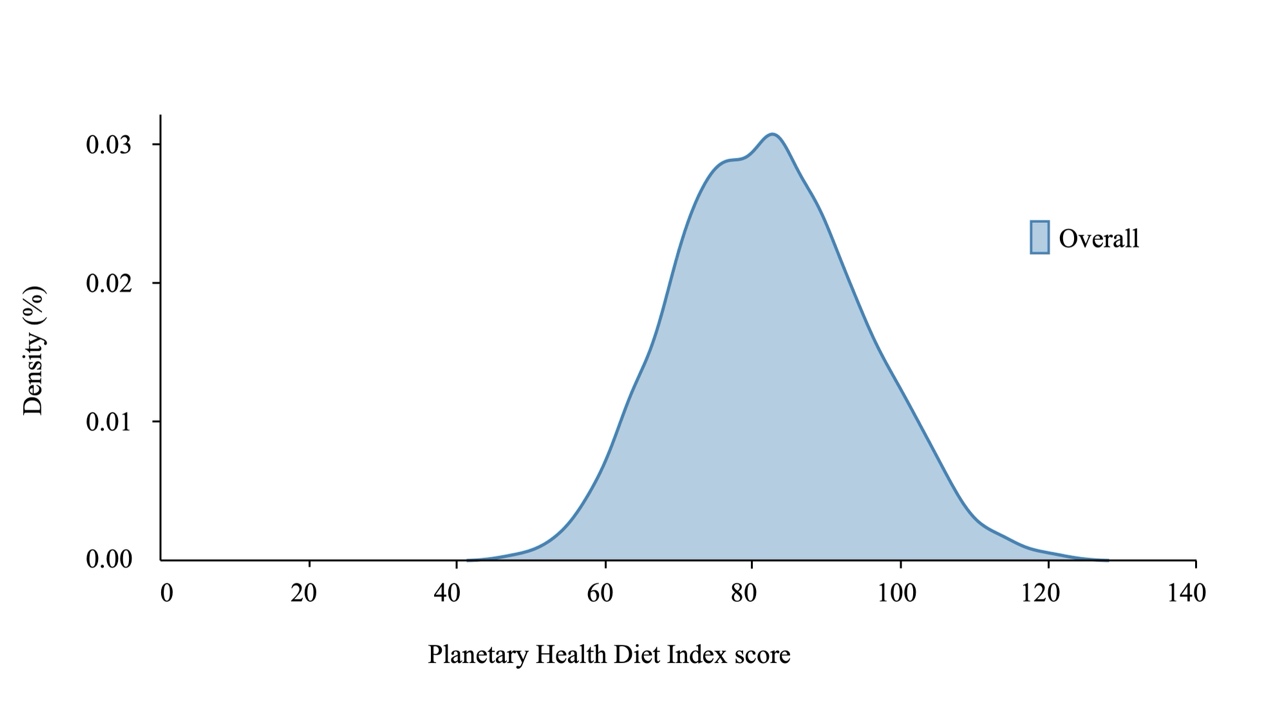


Weighted density plot of the Planetary Health Diet Index. The density plot is a smoothed representation of a histogram and shows the distribution of a variable. In the graph, the total area under the curve is 1 (i.e., the integral of the variables is scaled to 1). The density plot was weighted for sex, age, marital status, major region of Switzerland, nationality, household size, season and weekday.
